# Supplementary material for: Unravelling diagnostic clusters and immune landscapes of disulfidptosis patterns in gastric cancer through bioinformatic assay
Source: publisher site journal article supplement (doi:10.18632/aging.205365), 2023-12-27
Supplement: Supplementary file [file aging-v15i24-205365-supplementary-material-SD1.pdf]

## SUPPLEMENTARY TABLES

**Supplementary Table 1. The detailed information of GO enrichment analysis in Figure 2R.**

| ONTOLOGY | ID         | Description                                           | p-value     | p.adjust    |
|----------|------------|-------------------------------------------------------|-------------|-------------|
| BP       | GO:0070527 | platelet aggregation                                  | 7.77E-10    | 5.58E-07    |
| BP       | GO:0034109 | homotypic cell-cell adhesion                          | 3.94E-09    | 1.41E-06    |
| BP       | GO:0030168 | platelet activation                                   | 9.73E-08    | 1.88E-05    |
| BP       | GO:0007596 | blood coagulation                                     | 1.42E-07    | 1.88E-05    |
| BP       | GO:0007599 | hemostasis                                            | 1.55E-07    | 1.88E-05    |
| BP       | GO:0050817 | coagulation                                           | 1.57E-07    | 1.88E-05    |
| BP       | GO:0007016 | cytoskeletal anchoring at plasma membrane             | 2.70E-05    | 0.002770637 |
| BP       | GO:0034329 | cell junction assembly                                | 3.31E-05    | 0.002966568 |
| BP       | GO:0034330 | cell junction organization                            | 6.80E-05    | 0.004887264 |
| BP       | GO:0007229 | integrin-mediated signaling pathway                   | 7.07E-05    | 0.004887264 |
| CC       | GO:0005925 | focal adhesion                                        | 8.18E-09    | 3.07E-07    |
| CC       | GO:0005924 | cell-substrate adherens junction                      | 8.61E-09    | 3.07E-07    |
| CC       | GO:0030055 | cell-substrate junction                               | 9.21E-09    | 3.07E-07    |
| CC       | GO:0042470 | melanosome                                            | 1.03E-06    | 2.06E-05    |
| CC       | GO:0048770 | pigment granule                                       | 1.03E-06    | 2.06E-05    |
| CC       | GO:0001726 | ruffle                                                | 7.08E-06    | 0.000118024 |
| CC       | GO:0005903 | brush border                                          | 5.35E-05    | 0.000763911 |
| CC       | GO:0005938 | cell cortex                                           | 6.96E-05    | 0.000835652 |
| CC       | GO:0005884 | actin filament                                        | 7.52E-05    | 0.000835652 |
| CC       | GO:0030863 | cortical cytoskeleton                                 | 8.57E-05    | 0.00085742  |
| MF       | GO:0045296 | cadherin binding                                      | 1.08E-07    | 1.16E-05    |
| MF       | GO:0050839 | cell adhesion molecule binding                        | 1.21E-06    | 6.46E-05    |
| MF       | GO:0015175 | neutral amino acid transmembrane transporter activity | 0.00026672  | 0.007652178 |
| MF       | GO:0003779 | actin binding                                         | 0.000286063 | 0.007652178 |
| MF       | GO:0051015 | actin filament binding                                | 0.000458475 | 0.00981136  |
| MF       | GO:0099516 | ion antiporter activity                               | 0.000936647 | 0.016703538 |
| MF       | GO:0048365 | Rac GTPase binding                                    | 0.001322735 | 0.020218942 |
| MF       | GO:0015171 | amino acid transmembrane transporter activity         | 0.001519457 | 0.020322732 |
| MF       | GO:0015297 | antiporter activity                                   | 0.001998362 | 0.023758299 |
| MF       | GO:0005200 | structural constituent of cytoskeleton                | 0.002861299 | 0.030615899 |

**Supplementary Table 2. The detailed information of KEGG enrichment analysis in Figure 2S.**

| <b>Term</b>                           | <b>p-value</b> | <b>p.adjust</b> |
|---------------------------------------|----------------|-----------------|
| Focal adhesion                        | 2.70E-07       | 2.29E-05        |
| Salmonella infection                  | 7.79E-07       | 3.31E-05        |
| Pathogenic Escherichia coli infection | 1.14E-05       | 2.28E-04        |
| Diabetic cardiomyopathy               | 1.29E-05       | 2.28E-04        |
| Proteoglycans in cancer               | 1.34E-05       | 2.28E-04        |
| Regulation of actin cytoskeleton      | 1.71E-05       | 2.42E-04        |
| Amyotrophic lateral sclerosis         | 1.26E-04       | 0.001526033     |
| Non-alcoholic fatty liver disease     | 1.94E-04       | 0.002061129     |
| Tight junction                        | 2.50E-04       | 0.002363637     |
| Ferroptosis                           | 4.23E-04       | 0.003598003     |

**Supplementary Table 3. The detailed information of GO enrichment analysis in Figure 6H.**

| <b>ONTOLOGY</b> | <b>ID</b>  | <b>Description</b>                                        | <b>p-value</b> | <b>p.adjust</b> |
|-----------------|------------|-----------------------------------------------------------|----------------|-----------------|
| BP              | GO:0006936 | muscle contraction                                        | 3.05E-10       | 4.44E-07        |
| BP              | GO:0003012 | muscle system process                                     | 7.47E-09       | 5.45E-06        |
| BP              | GO:0006937 | regulation of muscle contraction                          | 2.63E-06       | 0.001278253     |
| BP              | GO:0090287 | regulation of cellular response to growth factor stimulus | 1.40E-05       | 0.005097376     |
| BP              | GO:0007517 | muscle organ development                                  | 2.36E-05       | 0.00688819      |
| BP              | GO:0090257 | regulation of muscle system process                       | 3.55E-05       | 0.008035378     |
| CC              | GO:0043292 | contractile fiber                                         | 7.08E-10       | 9.13E-08        |
| CC              | GO:0030016 | myofibril                                                 | 8.07E-09       | 5.21E-07        |
| CC              | GO:0030017 | sarcomere                                                 | 5.42E-08       | 2.33E-06        |
| CC              | GO:0030018 | Z disc                                                    | 3.74E-07       | 1.21E-05        |
| CC              | GO:0031674 | I band                                                    | 6.49E-07       | 1.68E-05        |
| CC              | GO:0030055 | cell-substrate junction                                   | 0.000122462    | 0.002256807     |
| MF              | GO:0008307 | structural constituent of muscle                          | 1.44E-05       | 0.002218919     |
| MF              | GO:0003779 | actin binding                                             | 2.37E-05       | 0.002218919     |
